# Supplementary material for: Environmental Tobacco Smoke Exposure in Relation to Family Characteristics, Stressors and Chemical Co-Exposures in California Girls
Source: PubMed Central journal article supplement (PMC6862570; doi:10.3390/ijerph16214208), 2019-10-30
Supplement: ijerph-16-04208-s001.pdf [file ijerph-16-04208-s001.pdf]

**Supplementary Material for:**

**Environmental Tobacco Smoke Exposure in Relation to Family Characteristics,  
Stressors and Chemical Co-Exposures in California Girls**

GC Windham et al.

Table S1: Additional Biomarkers of Exposure Measured among Participants

Table S2: Urinary Cotinine Geometric Mean (GM) Levels ( $\mu\text{g/g}$  creatinine) by Demographic and Household Characteristics among Girls in “Non-smoking” Households

Table S3: Urinary Cotinine Geometric Mean (GM) Levels ( $\mu\text{g/g}$  creatinine) by Stressful Life Events among Girls in “Non-smoking” Households

**Table S1.** Additional Biomarkers of Exposure<sup>1</sup> Measured among Participants

| Analyte Category                                                     | Panel Compounds/Congeners                                                                                                                                                                                                                                                                  |
|----------------------------------------------------------------------|--------------------------------------------------------------------------------------------------------------------------------------------------------------------------------------------------------------------------------------------------------------------------------------------|
| Urinary Metal<br>(ug/g creatinine)                                   | antimony, arsenic, barium, beryllium, cadmium, cesium, cobalt, lead, manganese, molybdenum, platinum, strontium, thallium, tin, tungsten, uranium                                                                                                                                          |
| Blood Metal<br>(ug/L)                                                | arsenic, cadmium, lead, manganese, mercury                                                                                                                                                                                                                                                 |
| Urinary Polycyclic Aromatic Hydrocarbons (PAHs)<br>(ng/g creatinine) | 2-OH-fluorene (fluor-2), 3-OH-fluorene (fluor-3), 9-OH-fluorene (fluor-9), 1-naphthol (nap-1), 2-naphthol (nap-2), 1-OH-phenanthrene (phen-1), 2-OH-phenanthrene (phen-2), 3-OH-phenanthrene (phen-3), 4-OH-phenanthrene (phen-4), 1-hydroxypyrene (pyr_1)                                 |
| Urinary Phthalate metabolites<br>(ug/g creatinine)                   | Mono-n-butyl phthalate (mBP), Monobenzyl phthalate (mBzP2), Mono-3-carboxypropyl phthalate (mCPP), Mono-2-ethyl-5-carboxypentyl phthalate (mECP), Mono-2-ethylhexyl phthalate (mEHP), Mono-2-ethyl-5-oxohexyl phthalate (mEOHP), Monoethyl phthalate (mEP2), Monoisobutyl phthalate (miBP) |
| Urinary Phenol metabolites<br>(ug/g creatinine)                      | butyl paraben (B-PB), bisphenol A, 2,4-dichlorophenol (24-DCP), 2,5-dichlorophenol (25-DCP), methyl paraben (M-PB), propyl paraben (P-PB), triclosan (TCS)                                                                                                                                 |
| Serum Per- and Poly-Fluoroalkyl substances (PFASs)<br>(ug/L)         | 2-(N-methyl-perfluorooctane sulfonamido) acetate (Me-PFOSA-AcOH), perfluorodecanoate (PFDeA), perfluorohexane sulfonate (PFHxS), perfluorononanoate (PFNA), perfluorooctane sulfonate (PFOA)                                                                                               |
| Serum Polybrominated Diphenyl Ethers (PBDEs)<br>(ng/g Lipid)         | PBDE-28, PBDE-47, PBDE-85, PBDE-99, PBDE-100, PBDE-153, PBDE-154                                                                                                                                                                                                                           |
| Serum Polychlorinated Biphenyls (PCBs)<br>(ng/g Lipid)               | PCB-74, PCB-99, PCB-105, PCB-118, PCB-138/158, PCB-146, PCB-153, PCB-156, PCB-180, PCB-187, PCB-196/203                                                                                                                                                                                    |
| Organo-Chlorinated Pesticides (OCPs)<br>(ng/g Lipid)                 | hexachlorobenzene (HCB), oxychlordane (OXYCHLOR), p,p'-Dichlorodiphenyldichloroethylene (PP-DDE), trans-Nonachlor (T-NONA)                                                                                                                                                                 |

<sup>1</sup> Table includes all chemical classes/congeners in biomarker panels, even those not included in factor analysis due to <60% above limit of detection.

**Table S2.** Urinary Cotinine Geometric Mean (GM) Levels ( $\mu\text{g/g}$  creatinine) by Demographic and Household Characteristics among Girls in “Non-smoking” Households

| Characteristics                             | N=341 |      | Unadjusted |      | Adjusted <sup>1</sup> |           |      |
|---------------------------------------------|-------|------|------------|------|-----------------------|-----------|------|
|                                             | %     | GM   | 95% CI     | p    | GM <sup>2</sup>       | 95% CI    | p    |
| <b>Race</b>                                 |       |      |            |      |                       |           |      |
| Asian                                       | 13    | 0.25 | (.19-.34)  | 0.23 | 0.26                  | (.19-.34) | 0.77 |
| Black                                       | 20    | 0.33 | (.25-.44)  | <.01 | 0.26                  | (.21-.33) | 0.60 |
| Hispanic                                    | 23    | 0.26 | (.22-.30)  | 0.12 | 0.22                  | (.18-.28) | 0.54 |
| N-H White                                   | 44    | 0.21 | (.18-.24)  | ref  | 0.24                  | (.21-.29) | ref  |
| <b>Family Income</b>                        |       |      |            |      |                       |           |      |
| $\geq$ \$100k/yr                            | 45    | 0.20 | (.18-.23)  | ref  | 0.24                  | (.20-.28) | ref  |
| $\geq$ \$50, <100k/yr                       | 37    | 0.26 | (.22-.30)  | .03  | 0.25                  | (.21-.29) | 0.69 |
| <\$50k/yr                                   | 17    | 0.37 | (.29-.47)  | <.01 | 0.27                  | (.20-.36) | 0.51 |
| <b>Primary Caregiver Education</b>          |       |      |            |      |                       |           |      |
| Bachelor or Higher                          | 57    | 0.21 | (.19-.24)  | ref  | 0.23                  | (.20-.26) | ref  |
| Some College                                | 27    | 0.33 | (.26-.41)  | <.01 | 0.29                  | (.24-.35) | 0.04 |
| High School or less                         | 16    | 0.28 | (.22-.34)  | .05  | 0.24                  | (.18-.32) | 0.64 |
| <b>Home Ownership</b>                       |       |      |            |      |                       |           |      |
| Owns Home                                   | 76    | 0.21 | (.19-.24)  | ref  | 0.22                  | (.20-.25) | ref  |
| Is Renter                                   | 24    | 0.38 | (.30-.47)  | <.01 | 0.32                  | (.26-.40) | <.01 |
| <b>Two Parents in Household<sup>3</sup></b> |       |      |            |      |                       |           |      |
| Yes                                         | 84    | 0.22 | (.20-.25)  | ref  | 0.23                  | (.21-.26) | ref  |
| No                                          | 16    | 0.42 | (.31-.55)  | <.01 | 0.32                  | (.24-.42) | 0.05 |
| <b>Siblings in Household<sup>4</sup></b>    |       |      |            |      |                       |           |      |
| Yes                                         | 80    | 0.24 | (.22-.27)  | ref  | 0.24                  | (.22-.27) | ref  |
| No                                          | 20    | 0.27 | (.21-.35)  | 0.33 | 0.26                  | (.20-.32) | 0.68 |
| <b>Crowding (# ppl/ # rooms)</b>            |       |      |            |      |                       |           |      |
| Not Crowded (< 1)                           | 92    | 0.24 | (.21-.26)  | ref  | 0.24                  | (.22-.26) | ref  |
| Crowded ( $\geq$ 1)                         | 8     | 0.40 | (.24-.64)  | <.01 | 0.33                  | (.23-.46) | 0.10 |

<sup>1</sup> Adjusted for all listed independent variables (N=336). <sup>2</sup> Geometric means were calculated using least squares means. <sup>3</sup> Parent was considered a biological parent. <sup>4</sup> Sibling was considered a biological sibling.

**Table S3.** Urinary Cotinine Geometric Mean (GM) Levels ( $\mu\text{g/g}$  creatinine) by Stressful Life Events among Girls in “Non-smoking” Households.

| Stressful Life Events                 | N=269 |                 | Unadjusted |      | Adjusted <sup>1</sup> |           |      |
|---------------------------------------|-------|-----------------|------------|------|-----------------------|-----------|------|
|                                       | %     | GM <sup>2</sup> | 95% CI     | p    | GM <sup>2</sup>       | 95% CI    | p    |
| <b>Pregnancy</b>                      |       |                 |            |      |                       |           |      |
| Total Number of Stressful Life Events |       |                 |            |      |                       |           |      |
| None                                  | 68    | 0.25            | (.22-.29)  | ref  | 0.25                  | (.22-.29) | ref  |
| 1-2 events                            | 29    | 0.24            | (.20-.29)  | 0.72 | 0.23                  | (.19-.29) | 0.50 |
| 3 or more events                      | 2     | 0.25            | (.06-.99)  | 0.99 | 0.24                  | (.12-.49) | 0.89 |
| Unemployment in the family            |       |                 |            |      |                       |           |      |
| No                                    | 93    | 0.25            | (.22-.28)  | ref  | 0.25                  | (.22-.28) | ref  |
| Yes                                   | 7     | 0.24            | (.14-.40)  | 0.79 | 0.22                  | (.14-.33) | 0.50 |
| Illness or injury in the family       |       |                 |            |      |                       |           |      |
| No                                    | 91    | 0.25            | (.22-.28)  | Ref  | 0.25                  | (.22-.28) | ref  |
| Yes                                   | 9     | 0.22            | (.15-.31)  | 0.46 | 0.22                  | (.15-.31) | 0.45 |
| Death of close family member          |       |                 |            |      |                       |           |      |
| No                                    | 91    | 0.25            | (.22-.28)  | Ref  | 0.25                  | (.22-.28) | ref  |
| Yes                                   | 9     | 0.26            | (.18-.37)  | 0.82 | 0.27                  | (.19-.38) | 0.61 |
| Separation or divorce                 |       |                 |            |      |                       |           |      |
| No                                    | 90    | 0.24            | (.22-.27)  | ref  | 0.25                  | (.22-.28) | ref  |
| Yes                                   | 10    | 0.31            | (.21-.45)  | 0.21 | 0.27                  | (.19-.38) | 0.56 |
| Legal or financial problems           |       |                 |            |      |                       |           |      |
| No                                    | 93    | 0.25            | (.23-.29)  | ref  | 0.25                  | (.23-.28) | ref  |
| Yes                                   | 7     | 0.18            | (.12-.28)  | 0.15 | 0.18                  | (.12-.27) | 0.09 |
| <b>Childhood (0-6 years)</b>          |       |                 |            |      |                       |           |      |
| Total Number of Stressful Life Events |       |                 |            |      |                       |           |      |
| None                                  | 36    | 0.23            | (.20-.27)  | ref  | 0.24                  | (.20-.29) | ref  |
| 1-2 events                            | 44    | 0.25            | (.21-.30)  | 0.55 | 0.25                  | (.21-.29) | 0.78 |
| 3 or more events                      | 19    | 0.28            | (.22-.37)  | 0.23 | 0.26                  | (.20-.33) | 0.64 |
| Unemployment in the family            |       |                 |            |      |                       |           |      |
| No                                    | 79    | 0.23            | (.20-.26)  | ref  | 0.23                  | (.21-.26) | ref  |
| Yes                                   | 21    | 0.34            | (.25-.46)  | <.01 | 0.32                  | (.25-.40) | 0.02 |
| Illness or injury in the family       |       |                 |            |      |                       |           |      |
| No                                    | 71    | 0.26            | (.23-.30)  | ref  | 0.26                  | (.23-.30) | ref  |
| Yes                                   | 29    | 0.22            | (.18-.28)  | 0.19 | 0.22                  | (.18-.27) | 0.15 |
| Death of close family member          |       |                 |            |      |                       |           |      |
| No                                    | 61    | 0.26            | (.23-.31)  | ref  | 0.26                  | (.22-.30) | ref  |
| Yes                                   | 39    | 0.23            | (.19-.27)  | 0.22 | 0.23                  | (.20-.28) | 0.38 |
| Separation or divorce                 |       |                 |            |      |                       |           |      |
| No                                    | 78    | 0.23            | (.21-.26)  | ref  | 0.24                  | (.21-.27) | ref  |
| Yes                                   | 22    | 0.32            | (.24-.42)  | 0.02 | 0.28                  | (.22-.35) | 0.30 |
| Legal or financial problems           |       |                 |            |      |                       |           |      |
| No                                    | 83    | 0.25            | (.22-.28)  | ref  | 0.25                  | (.22-.28) | ref  |
| Yes                                   | 17    | 0.27            | (.20-.36)  | 0.59 | 0.23                  | (.18-.30) | 0.62 |

<sup>1</sup> Adjusted for primary caregiver education (3-levels) and home ownership (yes/no). <sup>2</sup> Geometric means and 95% confidence intervals were calculated using least squares mean.
